# Supplementary material for: Longitudinal assessment of tumor development using cancer avatars derived from genetically engineered pluripotent stem cells
Source: PubMed Central journal article supplement (PMC6987220; doi:10.1038/s41467-020-14312-1), 2020-01-28
Supplement: 41467_2020_14312_MOESM3_ESM.pdf [file 41467_2020_14312_MOESM3_ESM.pdf]

## **Description of Additional Supplementary Files**

File Name: Supplementary Data 1

Description: Genes used to score and classify: GBM subtypes, cell cycle status and stemness.

File Name: Supplementary Data 2

Description: Differentially expressed genes for all clusters in Figure 5.

File Name: Supplementary Data 3

Description: Gene Ontology analysis extended results for Figure 5.
